# Supplementary material for: Influence of human amylin on the membrane stability of rat primary hippocampal neurons
Source: Aging (Albany NY). 2020 May 28;12(10):8923–38. doi: 10.18632/aging.103105 (PMC7288967; doi:10.18632/aging.103105)
Supplement: Supplementary Figure 1 [file aging-12-103105-s001..pdf]

## SUPPLEMENTARY FIGURE

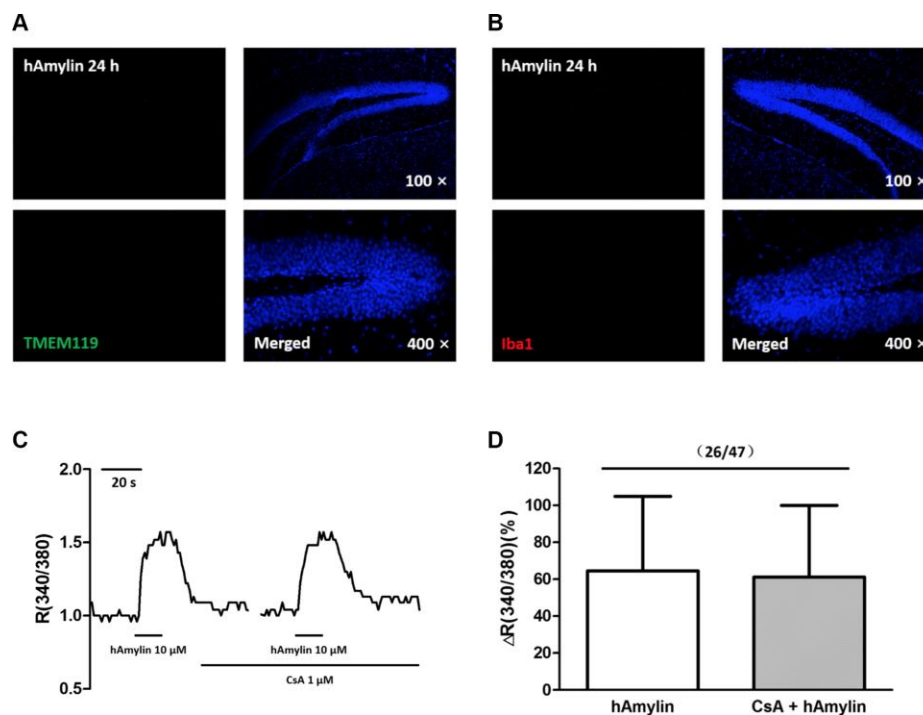

**Supplementary Figure 1.** (A, B) Twenty-four hours after hAmylin was injected into the lateral ventricle, no fluorescence of TMEM119 (microglial labeling) (A) or Iba1 (microglial and macrophage labeling) (B) was observed in the hippocampal dentate gyrus. (C) Typical traces showing the effects of 10 μM hAmylin and 10 μM hAmylin + 1 μM CsA on  $[Ca^{2+}]_i$  in hippocampal neurons. (D) CsA did not change the hAmylin-induced increase in  $[Ca^{2+}]_i$ . The ratio in parentheses is the positive percentage of neurons responding to hAmylin.  $p > 0.05$  versus the response before CsA treatment (paired t test).
